# Supplementary material for: Increased ACS Enzyme Dosage Causes Initiation of Climacteric Ethylene Production in Tomato
Source: MDPI journal article supplement (doi:10.3390/ijms231810788), 2022-09-15
Supplement: s1 [file s1]

**Table S1. List of primers used in this study**

| Target gene                                   | Primer name   | Sequence (5' - 3')        | Reference              |
|-----------------------------------------------|---------------|---------------------------|------------------------|
| For qPCR                                      |               |                           |                        |
| SIUbiquitin                                   | SIUbiquitin-F | CACCAAGCCAAAGAAGATCA      | Takayama et al., 2015  |
|                                               | SIUbiquitin-R | TCAGCATTAGGGCACTCCTT      |                        |
| LEACS1A                                       | ACS1A-F       | GACTTAAAGAAGGGGGAAAATGGTA | Shinozaki et al., 2015 |
|                                               | ACS1A-R       | TCACTCATCACTACAACAAAAGGAA |                        |
| LEACS2                                        | ACS2-F        | GGAGGTTCTGTAGGTGTTGAG     | Mantelin et al., 2013  |
|                                               | ACS2-R        | TAATGGTGAGGGGAGGAATAGGT   |                        |
| LEACS4                                        | ACS4-F        | AACAAGCACAATGGAAGAGGA     | Mantelin et al., 2013  |
|                                               | ACS4-R        | CGCACTACGAGCAAGGAAT       |                        |
| LEACS6                                        | ACS6-F        | CAACAACCCAAAAGCCTCAAT     | Wang et al., 2018      |
|                                               | ACS6-R        | CTCCTGTTCTCCATCTCAAATCTCT |                        |
| LEACO1                                        | ACO1-F        | ACCATGTCCTAAGCCCGATT      | Shinozaki et al., 2015 |
|                                               | ACO1-R        | ATTCGTGTCCCGTCTGTTTGT     |                        |
| LEACO3                                        | ACO3-F        | CATGTCCTAAGCCCGATTGA      | Shinozaki et al., 2015 |
|                                               | ACO3-R        | CCGAGTCCCATCTGTTTG        |                        |
| NOR                                           | NOR-F         | TACCGGAACCGACAAGC         | This study             |
|                                               | NOR-R         | ATATCATGCAAATCATCTATGGACC |                        |
| RIN                                           | RIN-F         | CATGGCATTGTGGTGAGCAAAGTGT | Wang et al., 2018      |
|                                               | RIN-R         | AGCATCATGTGTTGATGGTGCTGC  |                        |
| PSY1                                          | PSY1-F        | CTGAGATCTACCAATGAGTTAG    | Efremov et al., 2020   |
|                                               | PSY1-R        | TCTCGGGAGTCATTAGCATAG     |                        |
| ZDS                                           | ZDS-F         | TGCTTCAATGTGTCCTTACACC    | This study             |
|                                               | ZDS-R         | TGACCAGGTAACCTCAAGACCT    |                        |
| LCYE                                          | LCYE-F        | ACAGGTTATTCAAGTCGTCA      | This study             |
|                                               | LCYE-R        | CCAGTCCAAATAGGAAAAACGA    |                        |
| LCYB                                          | LCYB-F        | TTGACTTAGAACCTCGTTATTGG   | This study             |
|                                               | LCYB-R        | AACAGTTCCTTTGTCATTATCTC   |                        |
| For Sequencing & methylation sensitive RT-PCR |               |                           |                        |
| NOR-upsteam                                   | NOR-upsteam-F | AAAATAATTAATCCGTCCA       | This study             |
|                                               | NOR-upsteam-R | TGATAACTGAAAATTAGGCAA     |                        |

**Table S2. TEs that identified in the regulatory sequence of ACS4**

|                                                   | Query |       | Name             | Subject |       | Class           |
|---------------------------------------------------|-------|-------|------------------|---------|-------|-----------------|
|                                                   | From  | To    |                  | From    | To    |                 |
| <i>S. lycopersicum</i>                            |       |       |                  |         |       |                 |
|                                                   | -1866 | -1735 | BEL-24_TrVa-I    | 2118    | 2270  | LTR/BEL         |
|                                                   | -1244 | -1151 | Gypsy-36_BiGl-I  | 150     | 244   | LTR/Gypsy       |
|                                                   | -1150 | -1115 | Mariner-110_CCri | 1564    | 1598  | DNA/Mariner     |
|                                                   | -1047 | -912  | CR1-49_HM        | 603     | 715   | NonLTR/CR1      |
|                                                   | -887  | -772  | Gypsy-22_GR-I    | 73      | 196   | LTR/Gypsy       |
|                                                   | -585  | -397  | EnSpm-6_VV       | 423     | 578   | DNA/EnSpm/CACTA |
| <i>S. lycopersicum</i> var.<br><i>cerasiforme</i> |       |       |                  |         |       |                 |
|                                                   | -1827 | -1696 | BEL-24_TrVa-I    | 2118    | 2270  | LTR/BEL         |
|                                                   | -1205 | -1113 | Gypsy-36_BiGl-I  | 151     | 244   | LTR/Gypsy       |
|                                                   | -1112 | -1076 | Mariner-110_CCri | 1563    | 1598  | DNA/Mariner     |
|                                                   | -1074 | -907  | MUDRAVI1         | 11199   | 11364 | DNA/MuDR        |
|                                                   | -576  | -517  | Gypsy13-I_SP     | 6204    | 6262  | LTR/Gypsy       |
|                                                   | -515  | -328  | HARB-N23_ALy     | 262     | 455   | DNA/Harbinger   |
| <i>S. pimpinellifolium</i>                        |       |       |                  |         |       |                 |
|                                                   | -1813 | -1682 | BEL-24_TrVa-I    | 2118    | 2270  | LTR/BEL         |
|                                                   | -1191 | -1098 | Gypsy-36_BiGl-I  | 150     | 244   | LTR/Gypsy       |
|                                                   | -1097 | -1062 | Mariner-110_CCri | 1564    | 1598  | DNA/Mariner     |
|                                                   | -1061 | -964  | hAT-19B_ArHy     | 4938    | 5023  | DNA/hAT         |
|                                                   | -808  | -671  | Zator-9_Rlr      | 3965    | 4123  | DNA/Zator       |
|                                                   | -584  | -397  | EnSpm-6_VV       | 423     | 578   | DNA/EnSpm/CACTA |
| <i>S. pennellii</i>                               |       |       |                  |         |       |                 |
|                                                   | -1805 | -1760 | Gypsy-103_ALy-I  | 2839    | 2882  | LTR/Gypsy       |
|                                                   | -1377 | -1244 | BEL-24_TrVa-I    | 2051    | 2211  | LTR/BEL         |
|                                                   | -1066 | -1016 | CR1-20_CGi       | 269     | 318   | NonLTR/CR1      |
|                                                   | -845  | -724  | hAT-26_HM        | 2927    | 3058  | DNA/hAT         |
|                                                   | -716  | -661  | hAT-7_HM         | 1715    | 1765  | DNA/hAT         |
|                                                   | -528  | -394  | EnSpm-6_VV       | 467     | 582   | DNA/EnSpm/CACTA |

**Table S3. TEs that identified in the regulatory sequence of *LCYE***

|                                                | Query |       | Name            | Subject |      | Class         |
|------------------------------------------------|-------|-------|-----------------|---------|------|---------------|
|                                                | From  | To    |                 | From    | To   |               |
| <i>S. lycopersicum</i>                         | -1990 | -1942 | hAT-N5_NS       | 686     | 735  | DNA/hAT       |
|                                                | -1711 | -1635 | TRAS-1_PXu      | 3703    | 3773 | NonLTR/R1     |
|                                                | -1020 | -723  | MuDR-N2_SLy     | 1       | 304  | DNA/MuDR      |
|                                                | -679  | -396  | hAT-N9_STu      | 1       | 281  | DNA/hAT       |
|                                                | -56   | -14   | HARB-5_OS       | 2080    | 2122 | DNA/Harbinger |
| <i>S. lycopersicum</i> var. <i>cerasiforme</i> |       |       |                 |         |      |               |
|                                                | -1991 | -1943 | hAT-N5_NS       | 686     | 735  | DNA/hAT       |
|                                                | -1712 | -1636 | TRAS-1_PXu      | 3703    | 3773 | NonLTR/R1     |
|                                                | -1021 | -723  | MuDR-N2_SLy     | 1       | 304  | DNA/MuDR      |
|                                                | -679  | -396  | hAT-N9_STu      | 1       | 281  | DNA/hAT       |
|                                                | -56   | -14   | HARB-5_OS       | 2080    | 2122 | DNA/Harbinger |
| <i>S. pimpinellifolium</i>                     |       |       |                 |         |      |               |
|                                                | -1990 | -1942 | hAT-N5_NS       | 686     | 735  | DNA/hAT       |
|                                                | -1721 | -1618 | Daphne-97_HMa   | 356     | 453  | NonLTR/Daphne |
|                                                | -1403 | -1173 | MuDR-14_GM      | 291     | 512  | DNA/MuDR      |
|                                                | -1167 | -1060 | Harbinger-N2_NS | 200     | 301  | DNA/Harbinger |
|                                                | -1021 | -722  | MuDR-N2_SLy     | 1       | 304  | DNA/MuDR      |
|                                                | -678  | -395  | hAT-N9_STu      | 1       | 281  | DNA/hAT       |
|                                                | -357  | -216  | MuDR-N7_AT      | 380     | 511  | DNA/MuDR      |
|                                                | -56   | -14   | HARB-5_OS       | 2080    | 2122 | DNA/Harbinger |
| <i>S. pennellii</i>                            |       |       |                 |         |      |               |
|                                                | -1997 | -1737 | MuDR-N2_SLy     | 1       | 264  | DNA/MuDR      |
|                                                | -1692 | -1410 | hAT-N9_STu      | 1       | 281  | DNA/hAT       |
|                                                | -1149 | -771  | MuDR-8_STu      | 5779    | 6156 | DNA/MuDR      |
|                                                | -370  | -144  | MuDR-8_STu      | 1       | 230  | DNA/MuDR      |

**Table S4. Comparison table for ethylene biosynthesis systems in tomato species**

|                          | <i>S. lycopersicum</i> |                            |                     |                      |
|--------------------------|------------------------|----------------------------|---------------------|----------------------|
|                          | cv. Ailsa Craig        | <i>S. pimpinellifolium</i> | <i>S. pennellii</i> | <i>S. peruvianum</i> |
| ACS genes                | <i>LEACS1A</i>         |                            |                     |                      |
|                          | <i>LEACS2</i>          | <i>LEACS2</i>              |                     |                      |
|                          | <i>LEACS4</i>          | <i>LEACS4</i>              | <i>LEACS4</i>       |                      |
|                          | <i>LEACS6</i>          | <i>LEACS6</i>              | <i>LEACS6</i>       | <i>LEACS6</i>        |
| ACO genes                | <i>LEACO1</i>          | <i>LEACO1</i>              | <i>LEACO1</i>       | <i>LEACO1</i>        |
|                          | <i>LEACO3</i>          | <i>LEACO3</i>              | <i>LEACO3</i>       | <i>LEACO3</i>        |
| Transcription factors    | <i>NOR</i>             | <i>NOR</i>                 |                     |                      |
|                          | <i>RIN</i>             | <i>RIN</i>                 |                     |                      |
| Ethylene-induced         |                        |                            |                     |                      |
| <i>LEACS2</i> expression | ✓                      | ✓                          | ✓                   | X                    |
| Ethylene-repressed       |                        |                            |                     |                      |
| <i>LEACS6</i> expression | ✓                      | ✓                          | ✓                   | ✓                    |
| Demethylated <i>NOR</i>  |                        |                            |                     |                      |
| promoter                 | ✓                      | ✓                          | ✓                   | -                    |

Expression levels for every gene across all wild species are compared with Ailsa Craig.

The lowly expressed genes are excluded from comparison table, which are 10 times lower than that of Ailsa Craig.

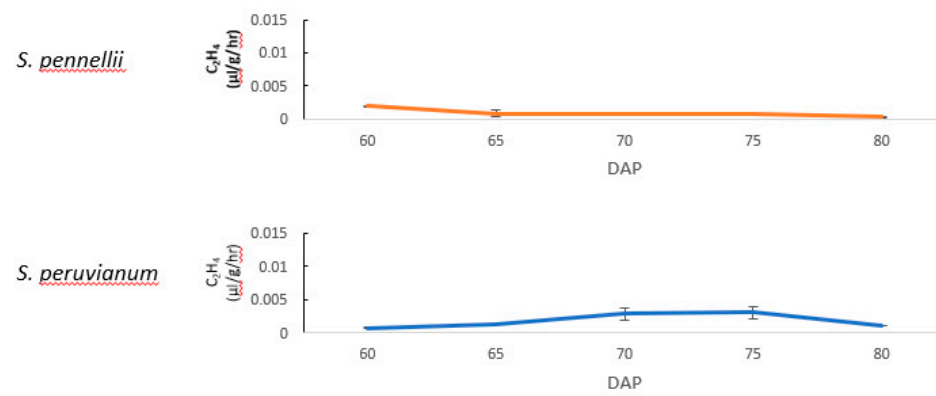

**Figure S1. Quantification of ethylene production from 60 to 80 DAP.** DAP: day after pollination. Fruits were observed from 60 to 80 DAP for *S. pennellii* and *S. peruvianum*.

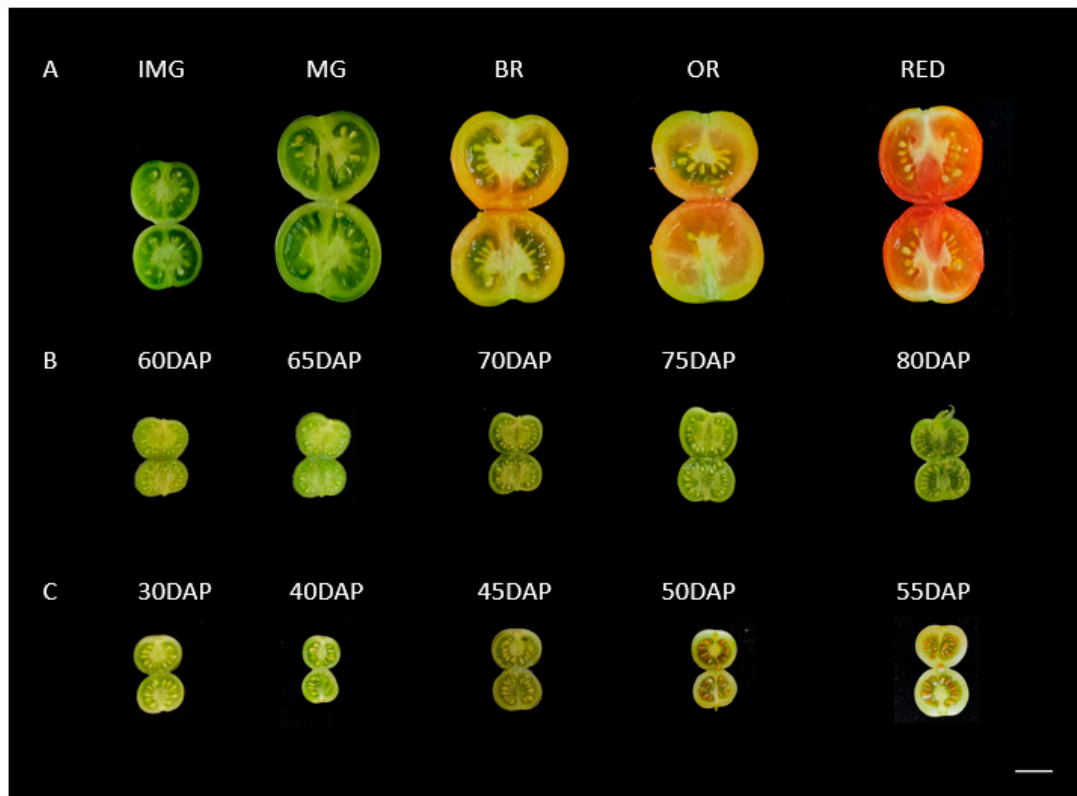

**Figure S2. Seed maturation in green-ripe wild relatives.** Ripening process and seed maturation for *S. lycopersicum* cv. Ailsa Craig (A), *S. pennellii* (B) and *S. peruvianum* (C). Scale bar = 1 cm. DAP: day after pollination. IMG: immature green; MG: mature green; BR: breaker; OR: orange; RED: red.

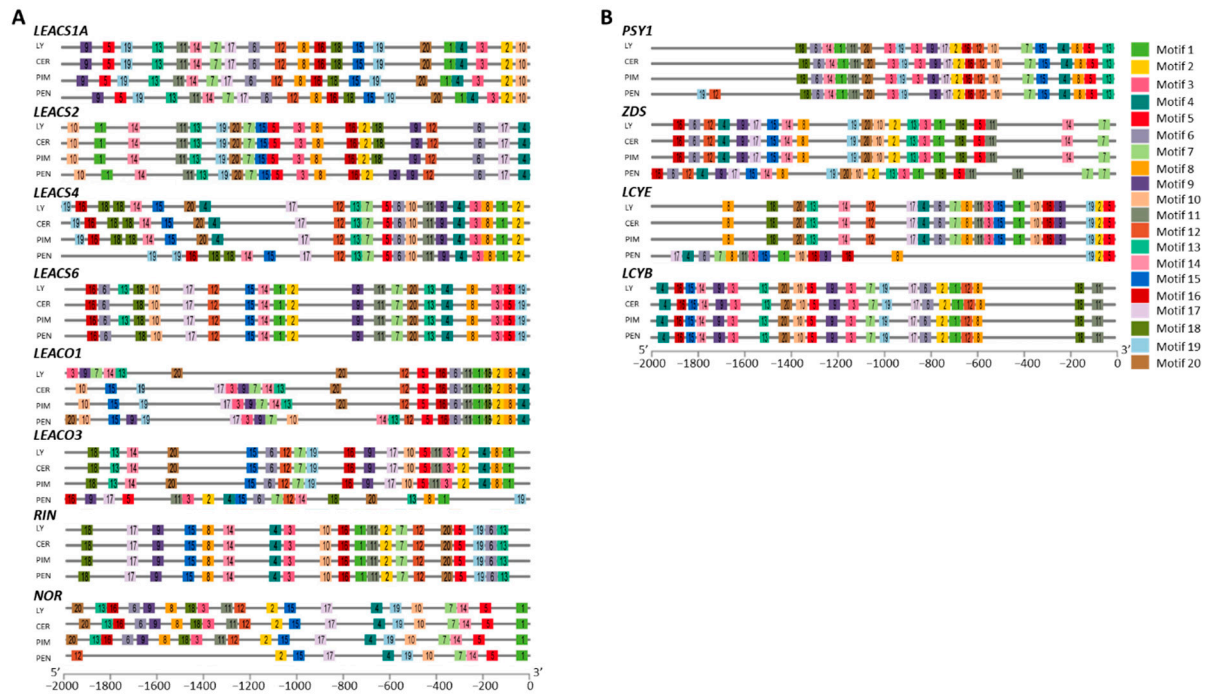

**Figure S3. *In silico* analysis of gene promoter regions.** MEME motif analysis of the regulatory sequence in ethylene biosynthetic genes (A). MEME motif analysis of the regulatory sequence in carotenoid biosynthesis-related genes (B). Each motif is represented by a colored box with a corresponding number. The order of the motifs correspond to the position in individual upstream sequences. The number of motifs does not correspond to the same motif among different genes. LY: *S. lycopersicum*; CER: *S. lycopersicum* var. *cerasiforme*; PIM: *S. pimpinellifolium*; PEN: *S. pennellii*.

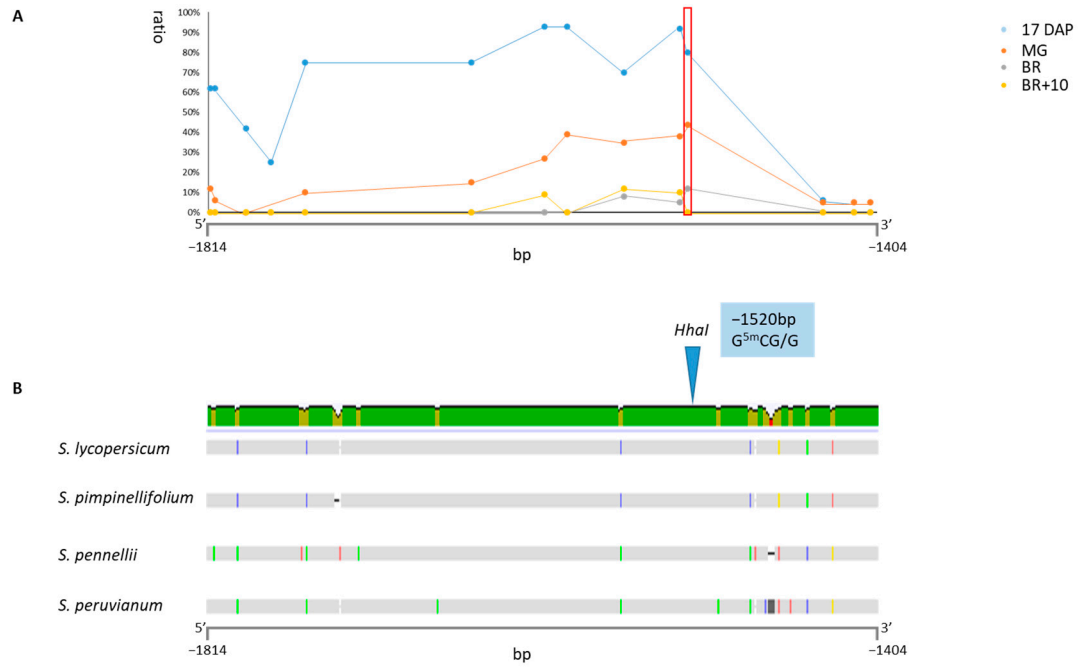

**Figure S4. Upstream region of *NOR* for DNA methylation assay.** Methylation level of a conservative region (-1814bp to -1414bp) in the upstream of *NOR* in *S. lycopersicum* (A). Data downloaded from tomato epigenome database (<http://ted.bti.cornell.edu/epigenome/>). Position of SNPs (B). Red indicated adenine, green indicated thymine, yellow indicated guanine, blue indicated cytosine and dark grey indicated unknown.



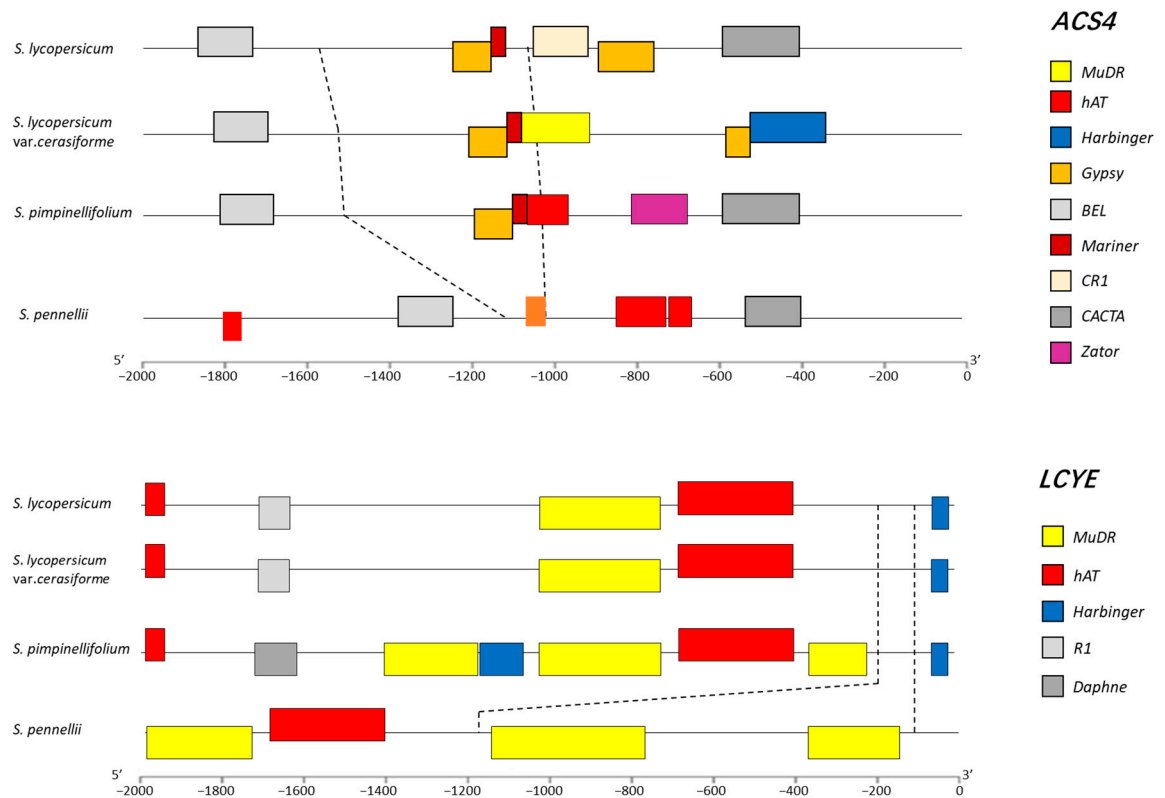

**Figure S5. TEs identified in the regulatory sequence of *ACS4* and *LCYE*.** Break lines show the position and length of insertion in the regulatory sequences. Upper and lower box indicates orientation of repeat fragment. Upper, sequence in same orientation as the locus; lower, sequence in opposite orientation.
